# Supplementary material for: An amphiphilic silicone-modified polysaccharide molecular hybrid with in situ forming of hierarchical superporous architecture upon swelling
Source: Royal Society of Chemistry journal article supplement (doi:10.1039/c2sm26361k), 2012-01-01

## SUPPORTING INFORMATION

**Figure S1.** PMSC cross-linked by esterification process with NOCC and PDMS.

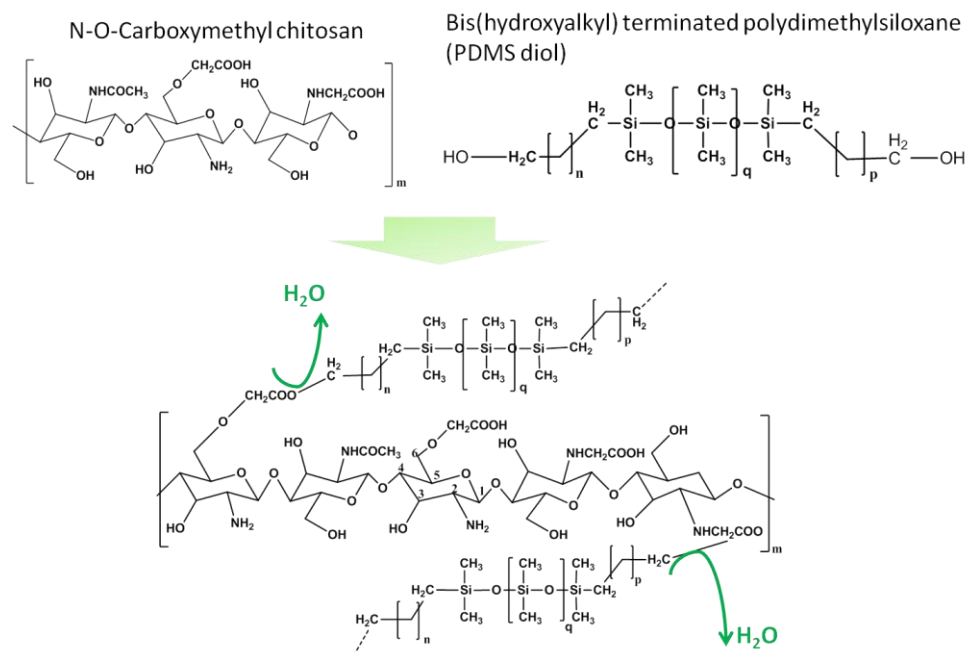

**Figure S2.** FTIR spectra of NOCC, PMSC-1, PMSC-2 and PMSC-3.

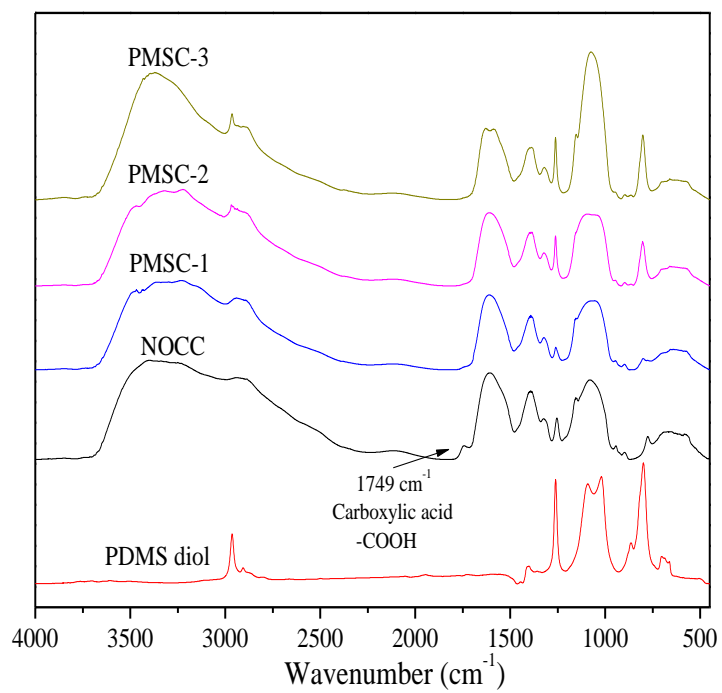

**Figure S3.** The schematic process of the formation of PMSC hydrogels. (b) The optical microscopic images of PMSC FITC-xerogel. (Because FITC dye is conjugated into the amino groups of NOCC, the darker color represents NOCC-poor area ).

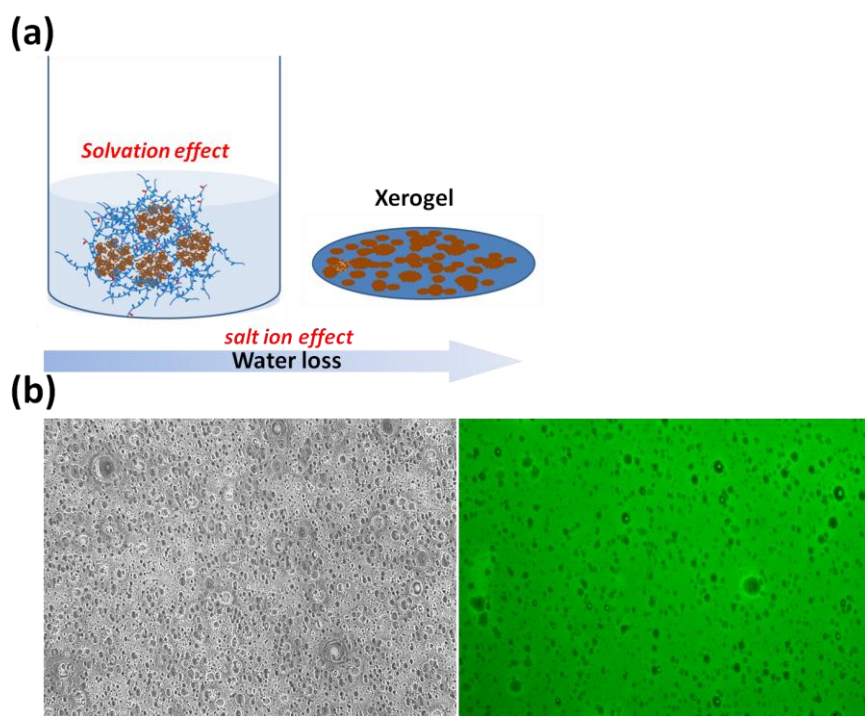

**Figure S4.** X-ray diffraction patterns of NOCC, PMSC-1, PMSC-2, and PMSC-3

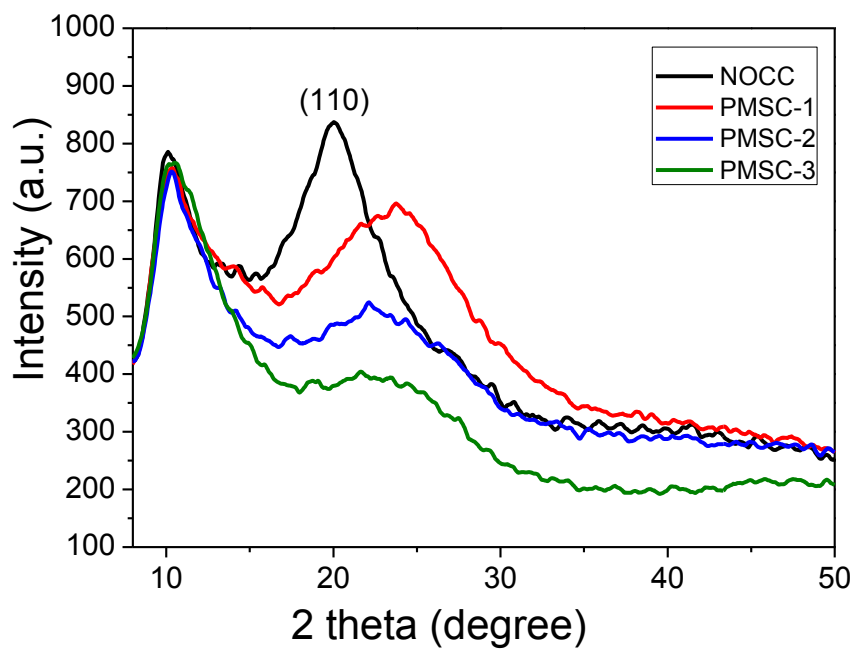

**Figure S5.** (a) Naked view of PMSC-2 and PMSC-3 after swollen in water for 24h. (b) The stain-stress curve of PMSC-1, PMSC-2, and PMSC-3 with an approximate swelling ratio of 1400%.

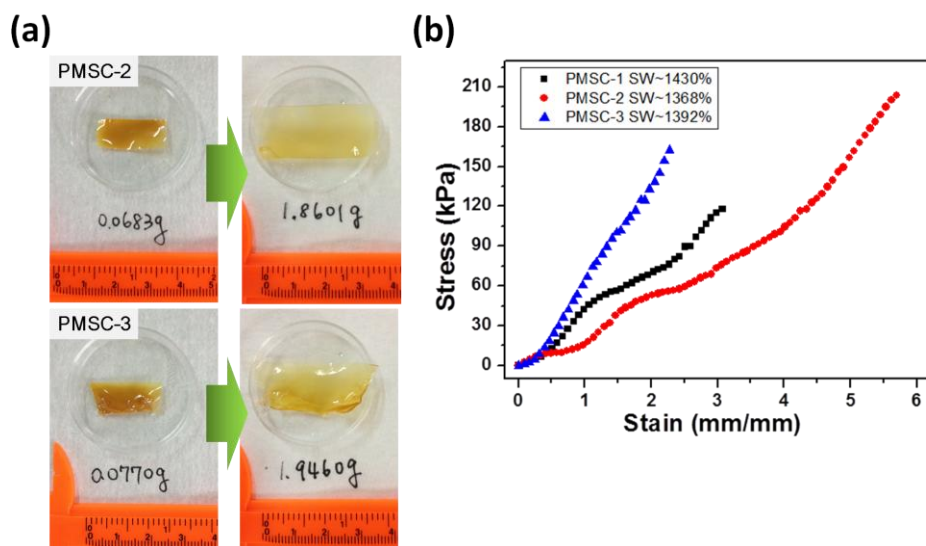

**Figure S6.** MTT tests were operated by incubating NOCC, PMSC-1, PMSC-2, and PMSC-3 solutions of 1mg/mL, 0.5mg/mL, and 0.1mg/mL with WS1 normal human dermal fibroblast (NHDF). The result demonstrated that compared with NOCC, all PMSC samples an excellent cell viability (>90%) for 24 hours.

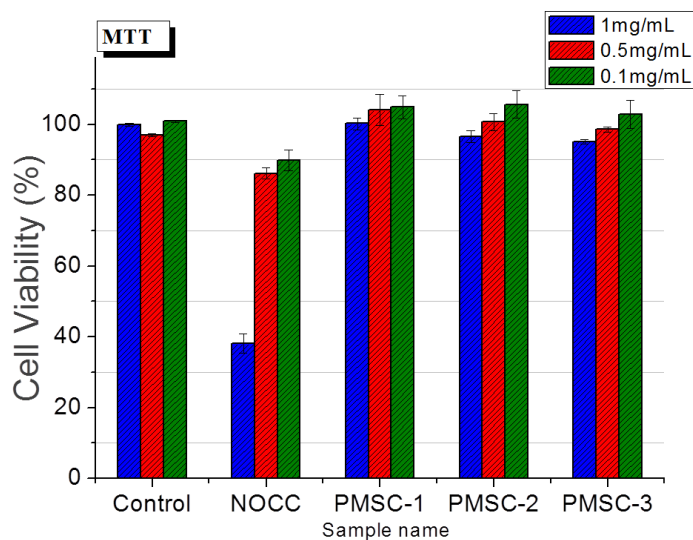

Supplement: c2sm26361k.pdf [file c2sm26361k.pdf]
